# Supplementary material
Source: PubMed Central journal article supplement (PMC6311132)
Supplement: NIHMS1002017-supplement-1.pdf [file NIHMS1002017-supplement-1.pdf]

# Supplementary Figure 1

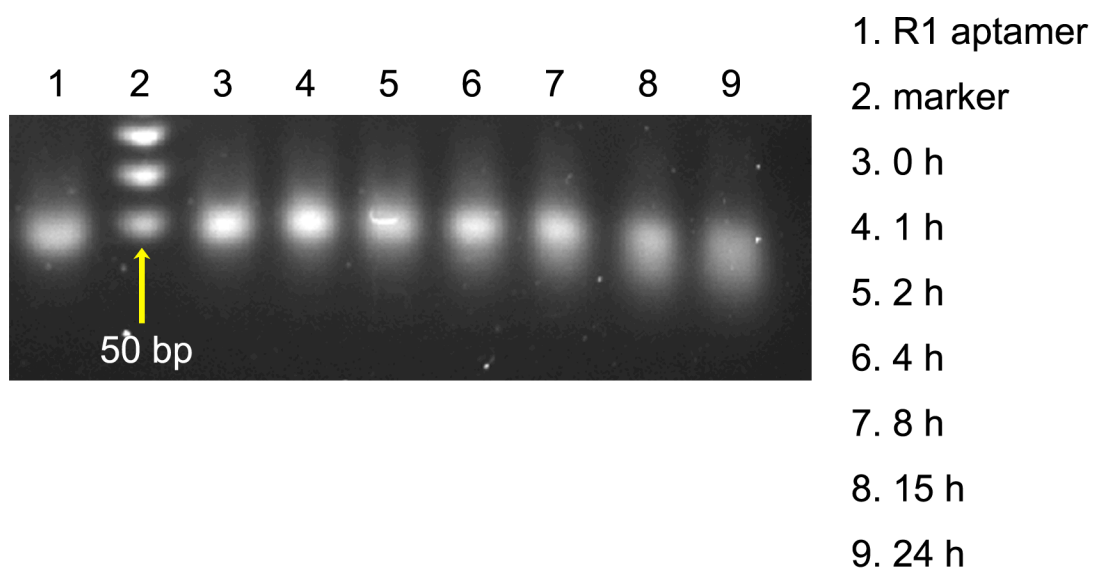

# Supplementary Figure 2

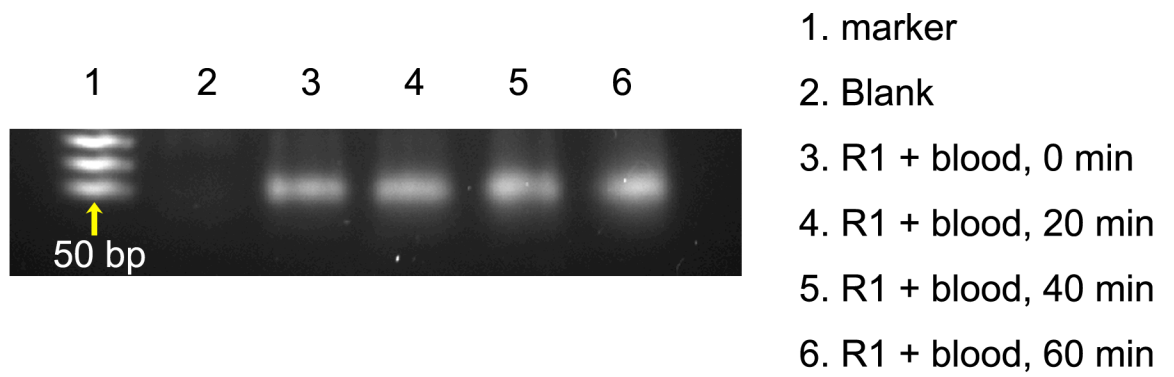

# Supplementary Figure 3

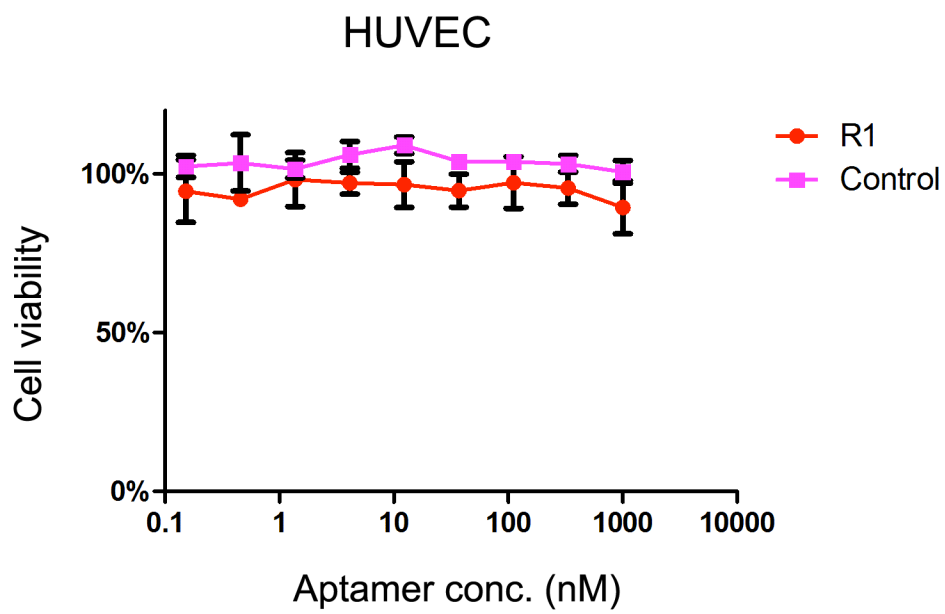

# Supplementary Figure 4

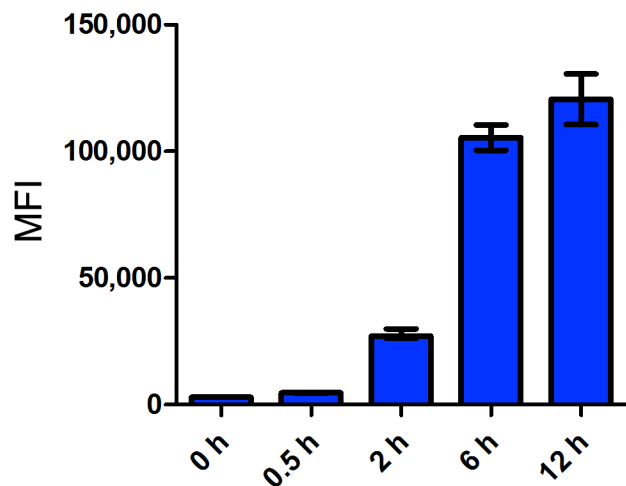

Time of HUVEC activation by conditioned media
